# Supplementary material for: Vibrational Study on the Structure, Bioactivity, and Silver Adsorption of Silk Fibroin Fibers Grafted with Methacrylonitrile
Source: MDPI journal article supplement (doi:10.3390/molecules28062551), 2023-03-10
Supplement: s1 [file s1]

**Table S1.** Weight gain % of the silk fibers under study after ageing in the Ag<sup>+</sup>-containing solution for 48h.

| Sample    | Weight gain %, t = 48h |
|-----------|------------------------|
| control   | 2.81                   |
| MAN 10%   | 0.01                   |
| MAN 25%   | 0.66                   |
| MAN 32.5% | 1.06                   |
| MAN 40%   | 1.65                   |
| MAN 60%   | 3.82                   |

**Table S2.** Weight gain % of the silk fibers under study after 7 and 28 days in the SBF solution.

| Sample    | Weight gain %, t = 7 days | Weight gain %, t = 28 days |
|-----------|---------------------------|----------------------------|
| control   | -1.53                     | -5.95                      |
| MAN 10%   | -1.49                     |                            |
| MAN 25%   | -0.97                     |                            |
| MAN 32.5% | 0.16                      |                            |
| MAN 40%   | 0.94                      | -4.12                      |
| MAN 60%   | 1.08                      | 1.66                       |

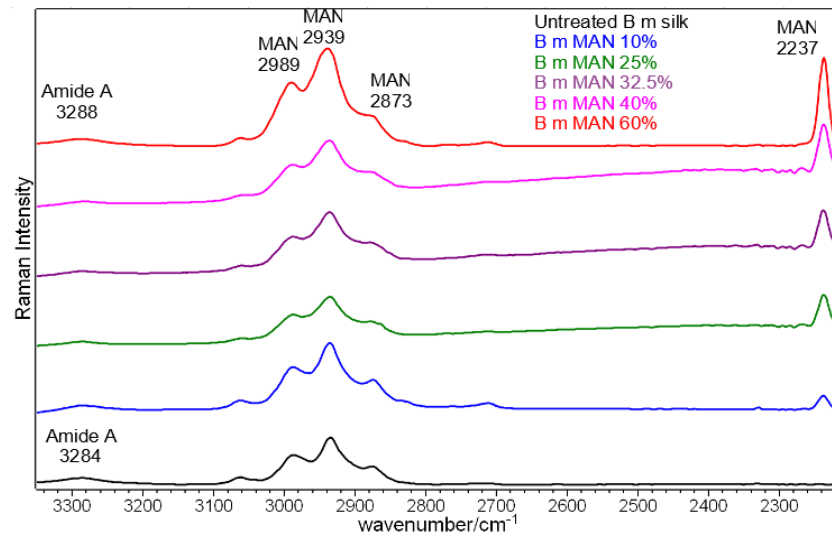

(a)

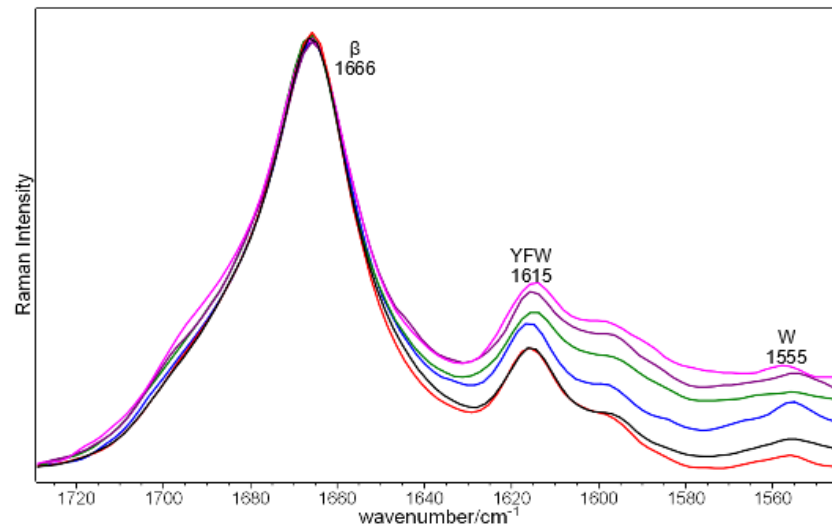

(b)

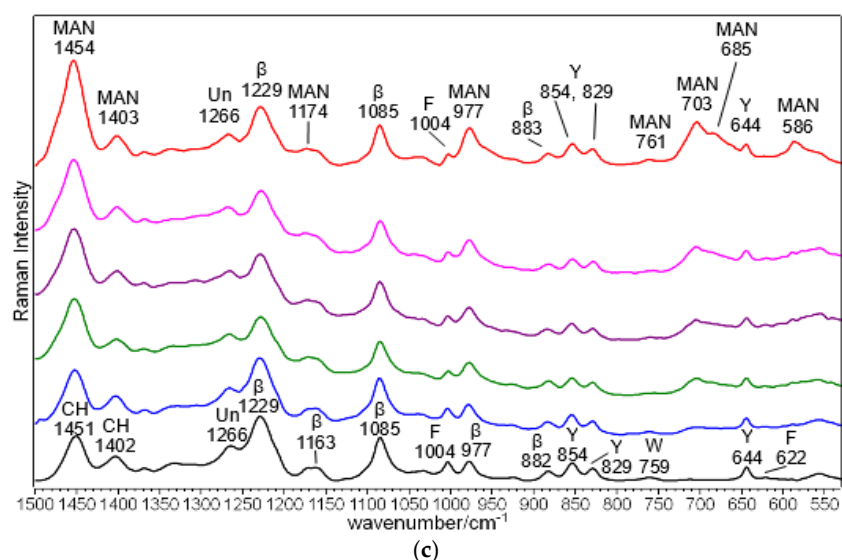

**Figure S1.** Raman spectra of *B. mori* silk fibroin fibers before and after grafting with MAN at different weight gains (i.e., 10%, 25%, 32.5%, 40%, and 60%) in three different spectral ranges: (a) 3350-2180  $\text{cm}^{-1}$ , (b) 1730-1530  $\text{cm}^{-1}$ , and (c) 1500-530  $\text{cm}^{-1}$ . The spectra are normalized to the intensity of the Amide I band. The main bands assignable to  $\beta$ -sheet ( $\beta$ ) or unordered (Un) conformation as well as to tyrosine (Y), phenylalanine (F), tryptophan (W), and the grafting agent (MAN) are indicated.

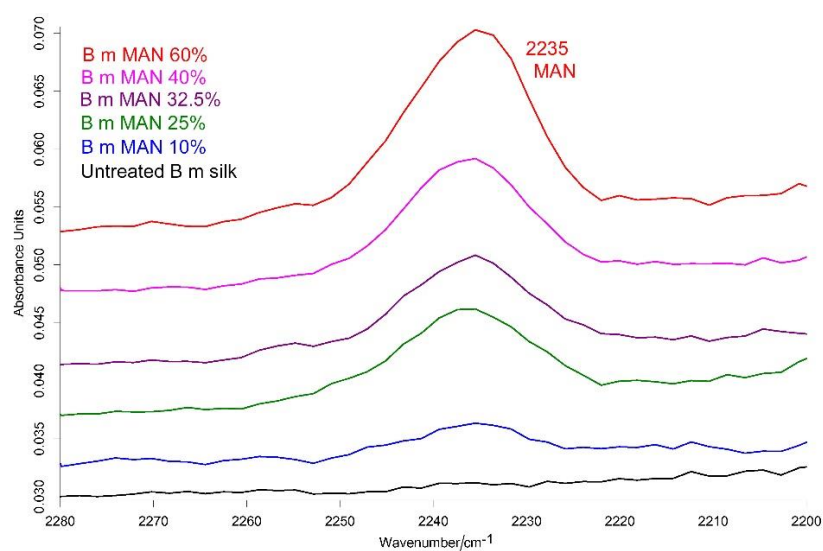

(a)

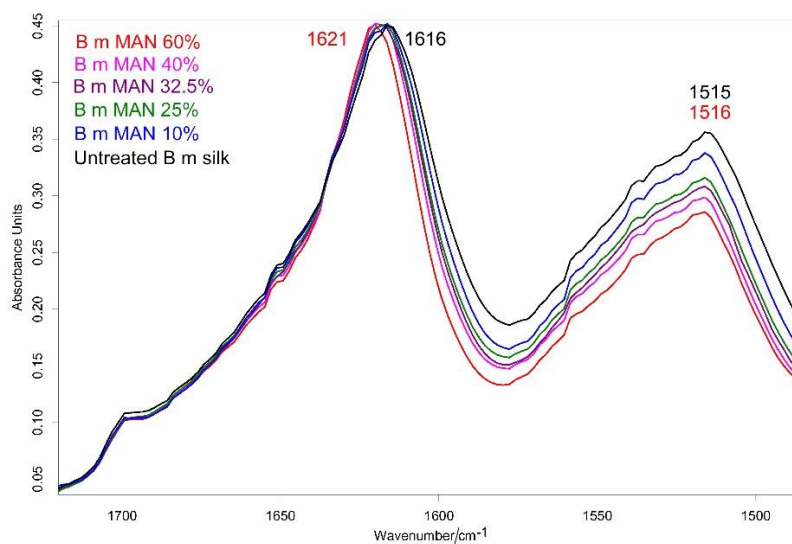

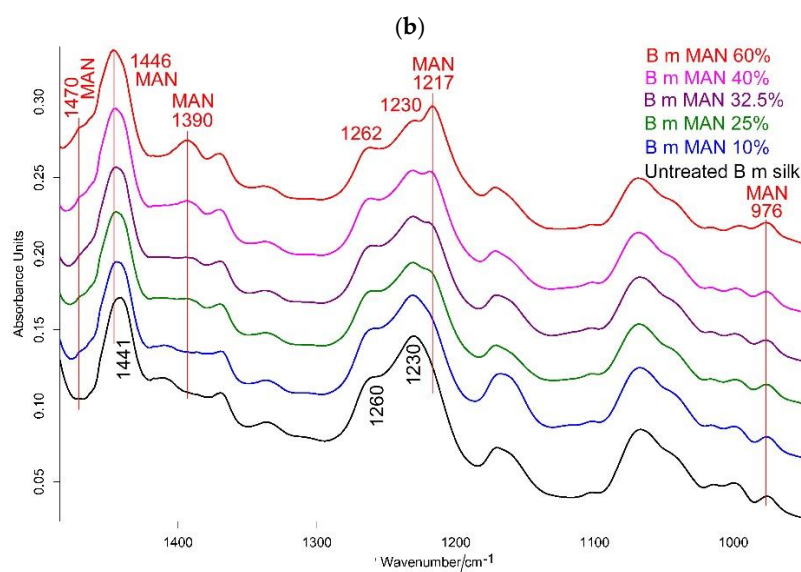

(c)

**Figure S2.** IR spectra recorded in the parallel orientation on *B. mori* silk fibroin fibers before and after grafting with MAN at different weight gains (i.e., 10%, 25%, 32.5%, 40%, and 60%) in three different spectral ranges: (a) 2280-2200  $\text{cm}^{-1}$ , (b) 1720-1485  $\text{cm}^{-1}$ , and (c) 1485-950  $\text{cm}^{-1}$ . The spectra are normalized to the intensity of the Amide I band. The main bands that underwent changes upon MAN grafting are indicated.

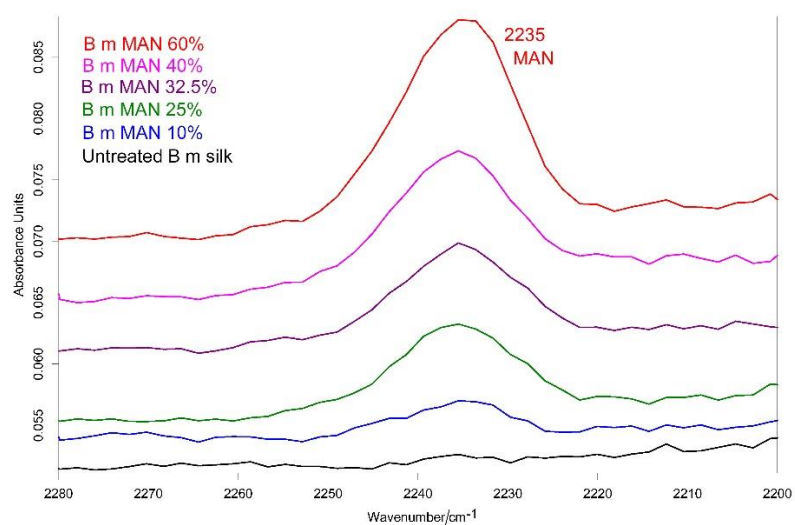

(a)

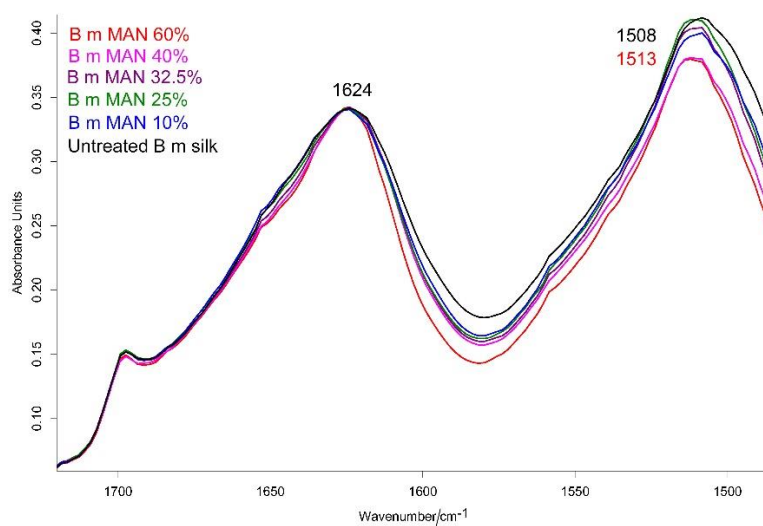

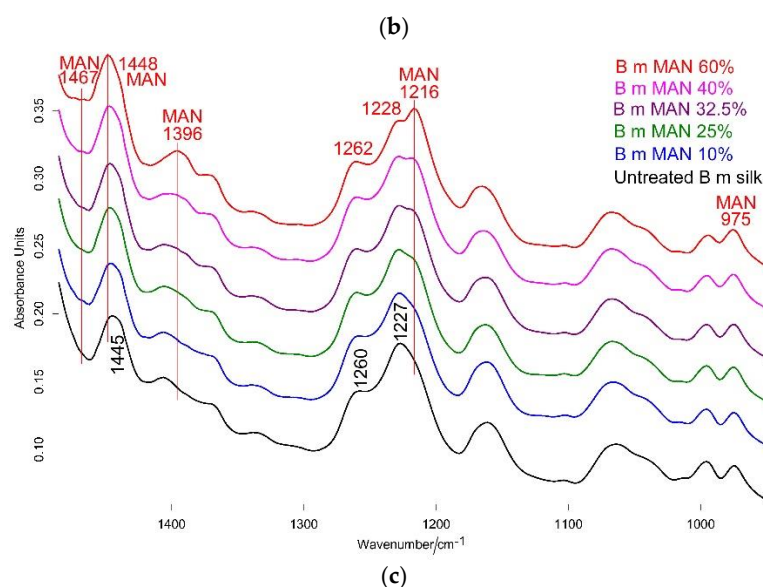

**Figure S3.** IR spectra recorded in the perpendicular orientation on *B. mori* silk fibroin fibers before and after grafting with MAN at different weight gains (i.e., 10%, 25%, 32.5%, 40%, and 60%) in three different spectral ranges: (a) 2280-2200 cm<sup>-1</sup>, (b) 1720-1485 cm<sup>-1</sup>, and (c) 1485-950 cm<sup>-1</sup>. The spectra are normalized to the intensity of the Amide I band. The main bands that underwent changes upon MAN grafting are indicated.

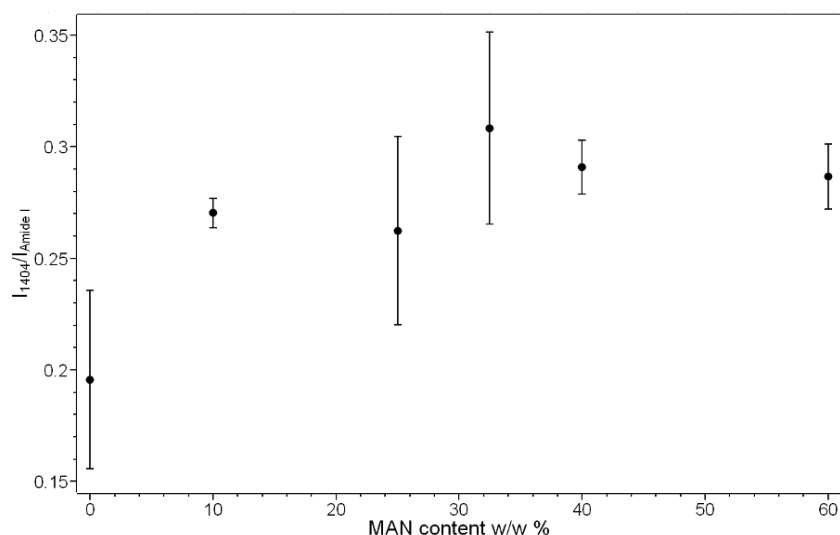

**Figure S4.** Trend of the  $I_{1404}/I_{\text{Amide I}}$  Raman intensity ratio as a function of the weight gain (i.e., MAN content w/w %) for the silk fibroin fibers grafted with MAN.

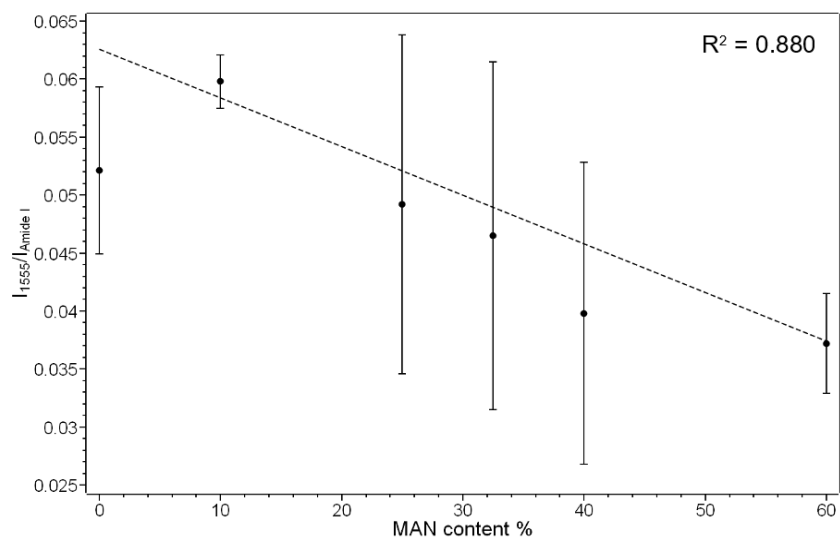

**Figure S5.** Trend of the  $I_{1555}/I_{\text{Amide I}}$  Raman intensity ratio as a function of the weight gain (i.e., MAN content w/w %) for the silk fibroin fibers grafted with MAN.

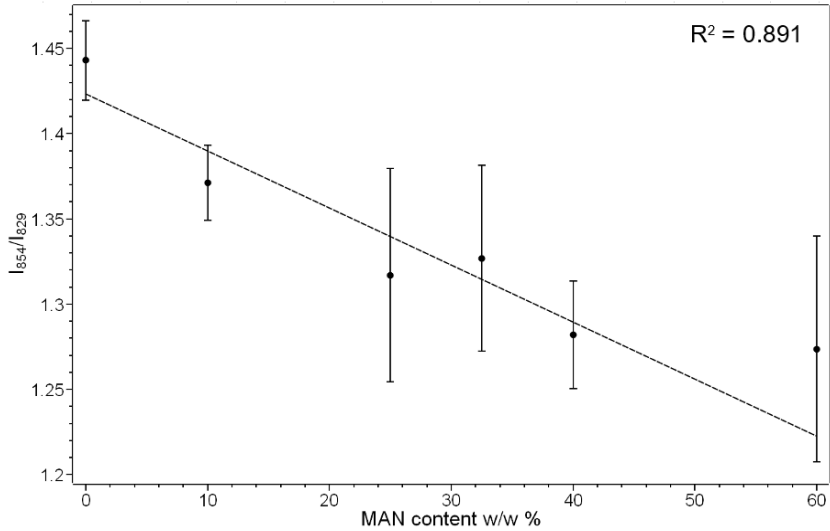

**Figure S6.** Trend of the  $I_{854}/I_{829}$  Raman intensity ratio as a function of the weight gain (i.e., MAN content w/w %) for the silk fibroin fibers grafted with MAN.

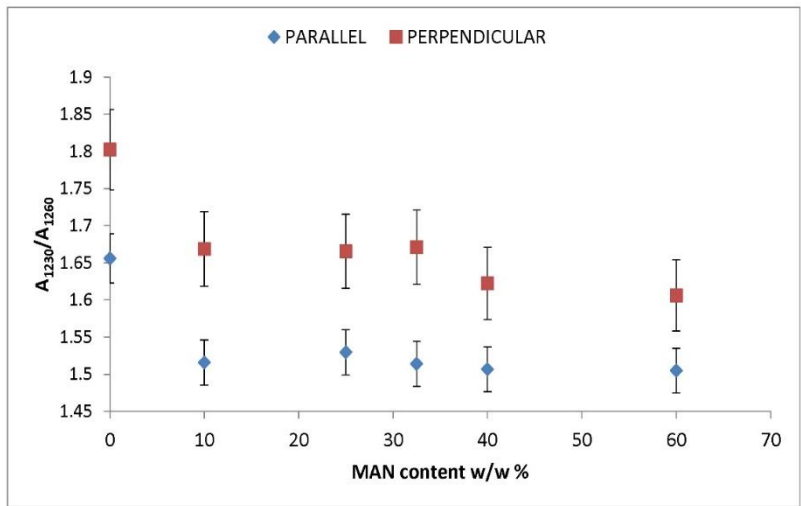

**Figure S7.** Trend of the  $A_{1230}/A_{1260}$  absorbance ratio as a function of the weight gain (i.e., MAN content w/w %).

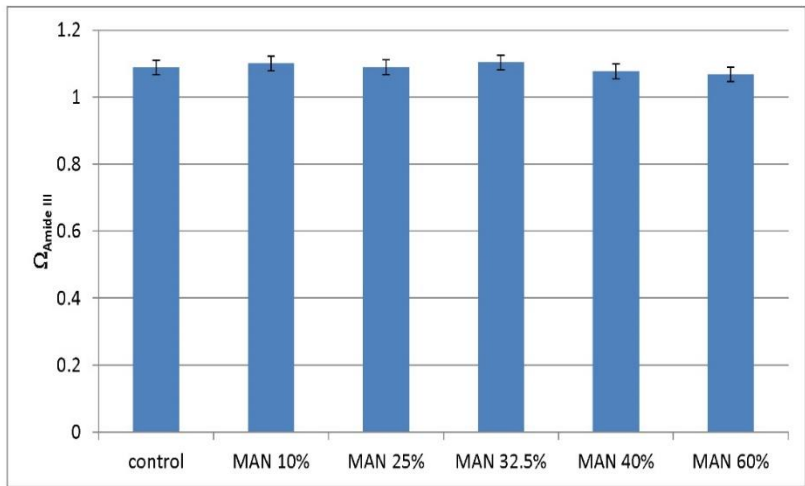

**Figure S8.** Values of the  $\Omega_{\text{Amide III}}$  marker as obtained from the IR spectra recorded in the parallel and perpendicular orientations on the samples under study (control = untreated fibers, and MAN grafted fibers containing different amounts of MAN).

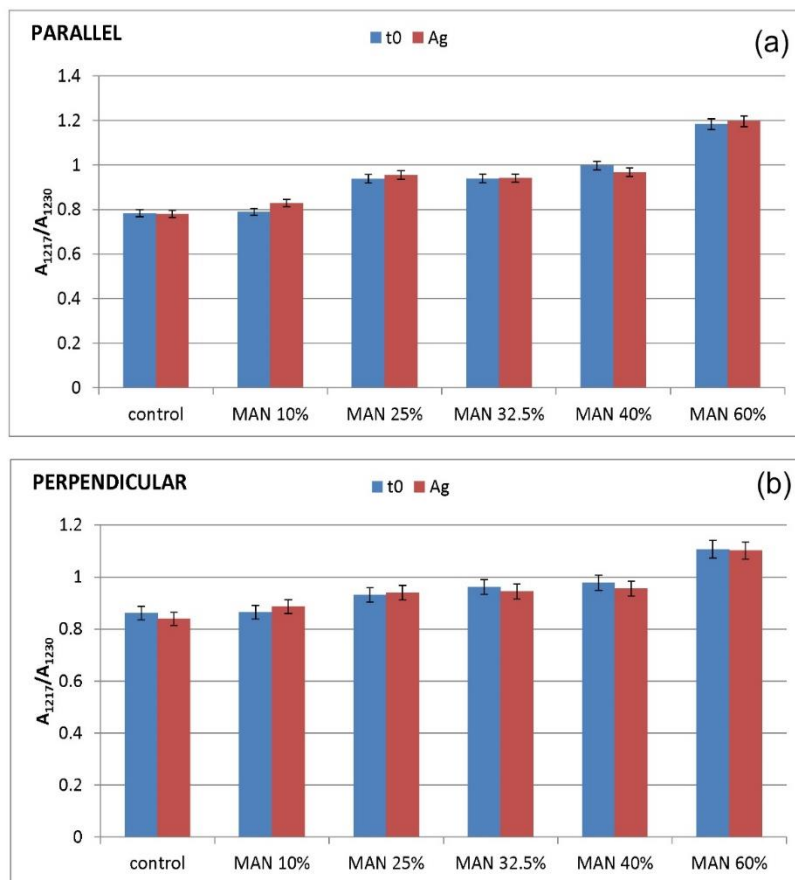

**Figure S9.** Values of the  $A_{1217}/A_{1230}$  absorbance ratio as obtained from the IR spectra recorded in the parallel (a) and perpendicular (b) orientations on the samples under study (control = untreated fibers, and MAN grafted fibers containing different amounts of MAN) before ( $t_0$ ) and after ageing of the fibers in the  $Ag^+$  containing solution for 48h.

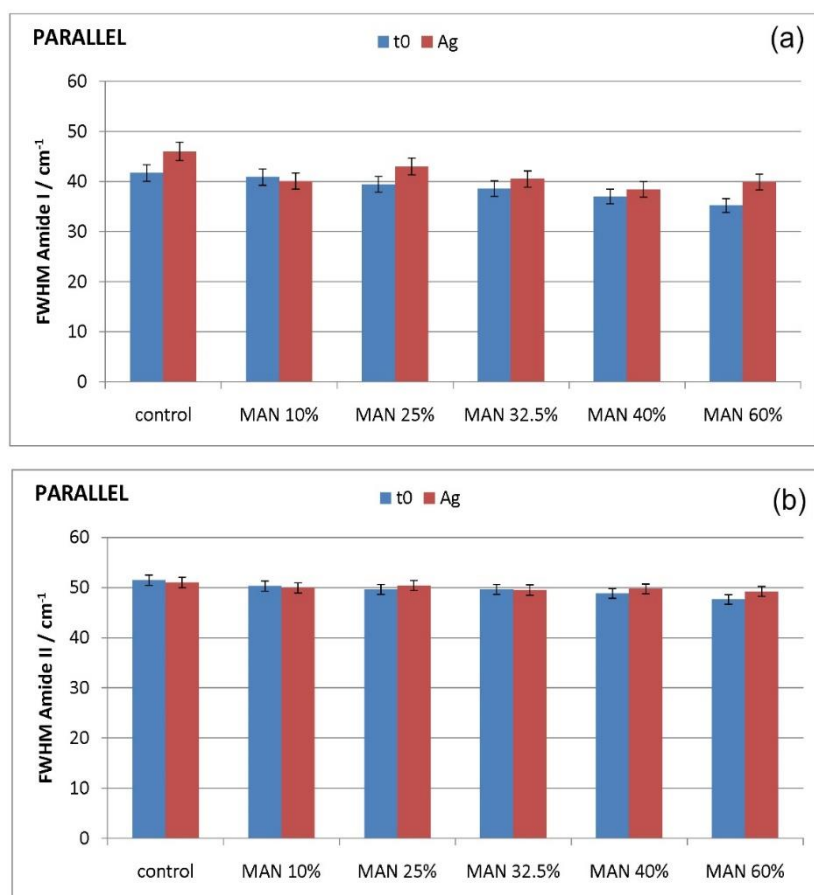

**Figure S10.** Values of the FWHM of Amide I (a) and Amide II (b) as obtained from the IR spectra recorded in the parallel orientation on the samples under study (control = untreated fibers, and MAN grafted fibers containing different amounts of MAN) before (t0) and after ageing of the fibers in the Ag<sup>+</sup> containing solution for 48h.

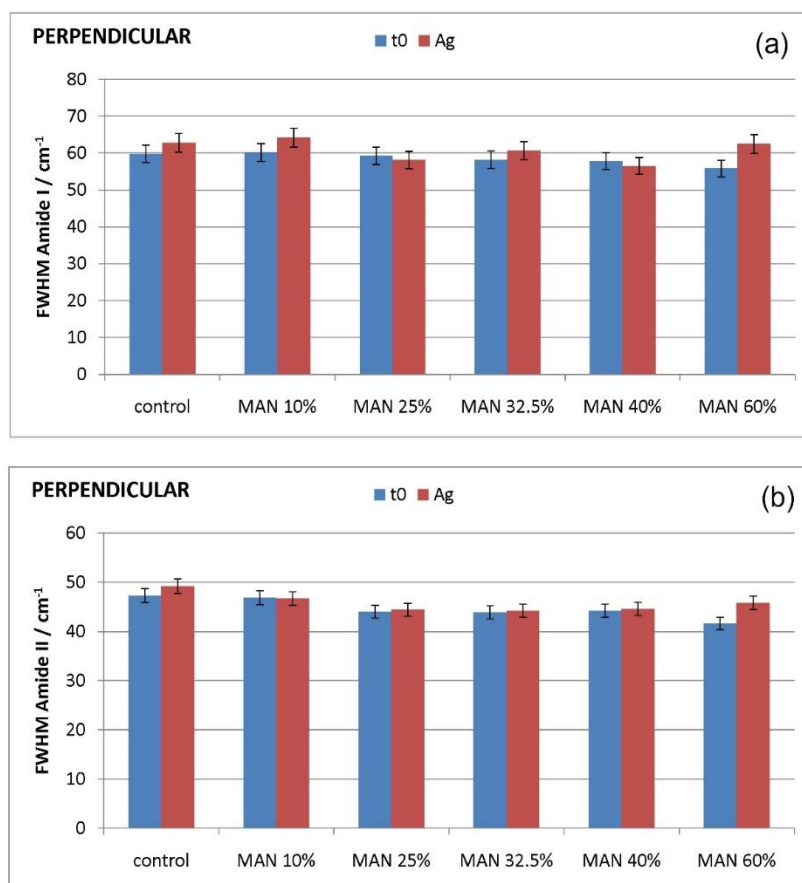

**Figure S11.** Values of the FWHM of Amide I (a) and Amide II (b) as obtained from the IR spectra recorded in the perpendicular orientation on the samples under study (control = untreated fibers, and MAN grafted fibers containing different amounts of MAN) before (t0) and after ageing of the fibers in the Ag<sup>+</sup> containing solution for 48h.



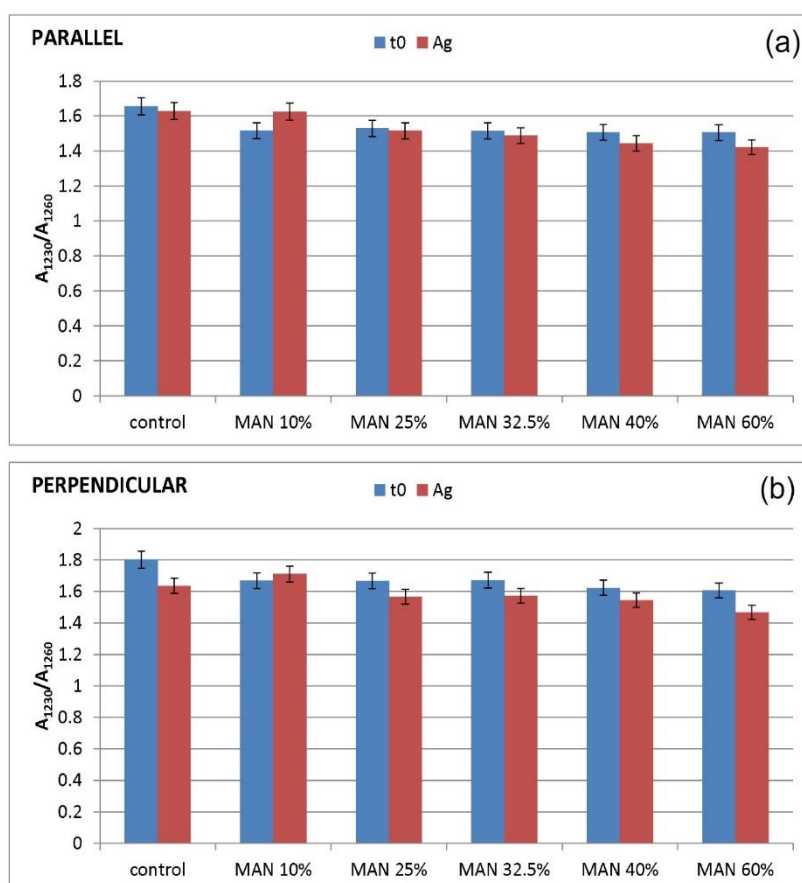

**Figure S12.** Values of the  $A_{1230}/A_{1260}$  absorbance ratio as obtained from the IR spectra recorded in the parallel (a) and perpendicular (b) orientations on the samples under study (control = untreated fibers, and MAN grafted fibers containing different amounts of MAN) before (t0) and after ageing of the fibers in the  $Ag^+$  containing solution for 48h.

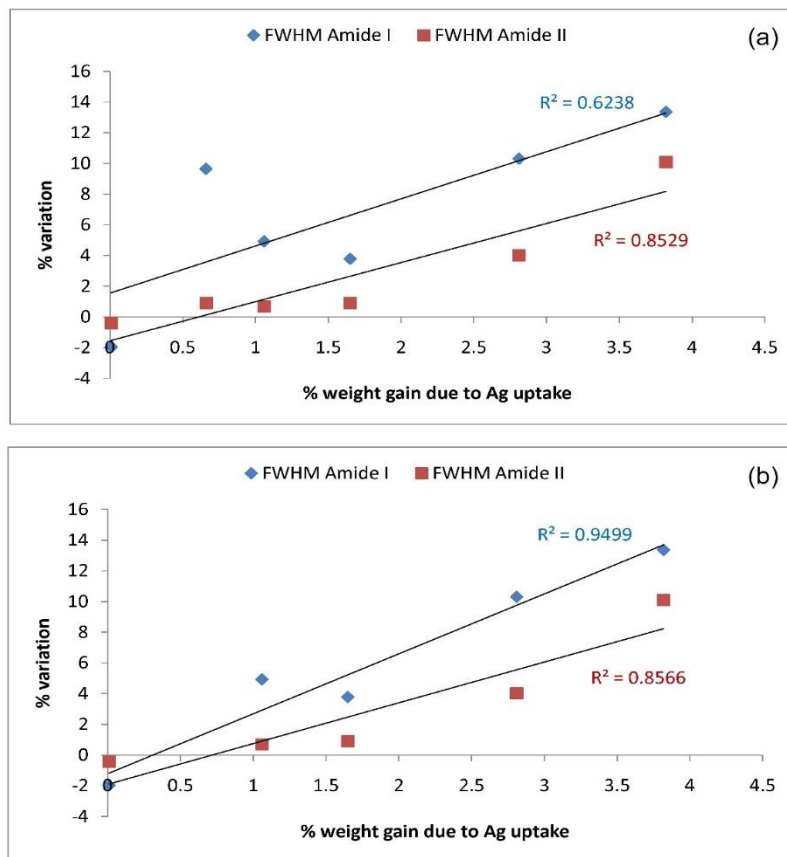

**Figure S13.** Trend of the % variation of the FWHM of Amide I (in the parallel spectra) and Amide II (in the perpendicular spectra) upon ageing in the  $\text{Ag}^+$  solution for 48h, as a function of the % weight gain due to silver uptake. Graph (a) reports data from all the samples, while (b) reports trends calculated excluding the 25% MAN-grafted sample (outlier).

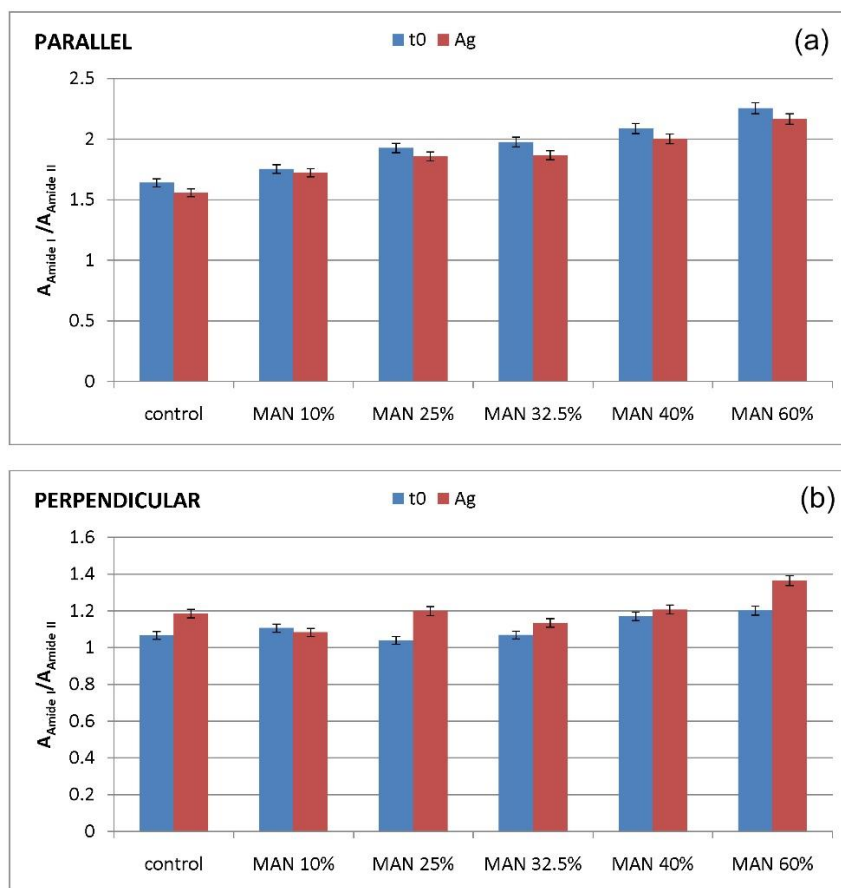

**Figure S14.** Values of the  $A_{\text{Amide I}}/A_{\text{Amide II}}$  absorbance ratio as obtained from the IR spectra recorded in the parallel (a) and perpendicular (b) orientations on the samples under study (control = untreated fibers, and MAN grafted fibers containing different amounts of MAN) before (t0) and after ageing of the fibers in the  $\text{Ag}^+$ -containing solution for 48h.

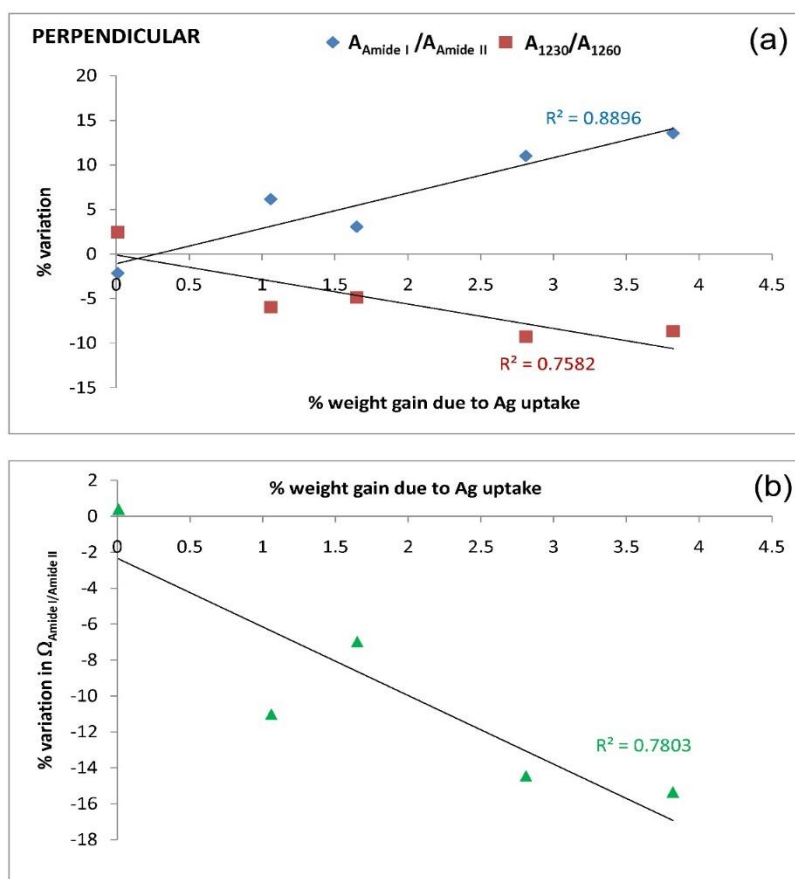

**Figure S15.** (a) Trend of the % variation of the  $A_{\text{Amide I}} / A_{\text{Amide II}}$  and  $A_{1230} / A_{1260}$  absorbance ratios (in the perpendicular spectra) and (b)  $\Omega_{\text{Amide I}} / A_{\text{Amide II}}$  upon ageing in the  $\text{Ag}^+$  solution for 48h, as a function of the % weight gain due to silver uptake.

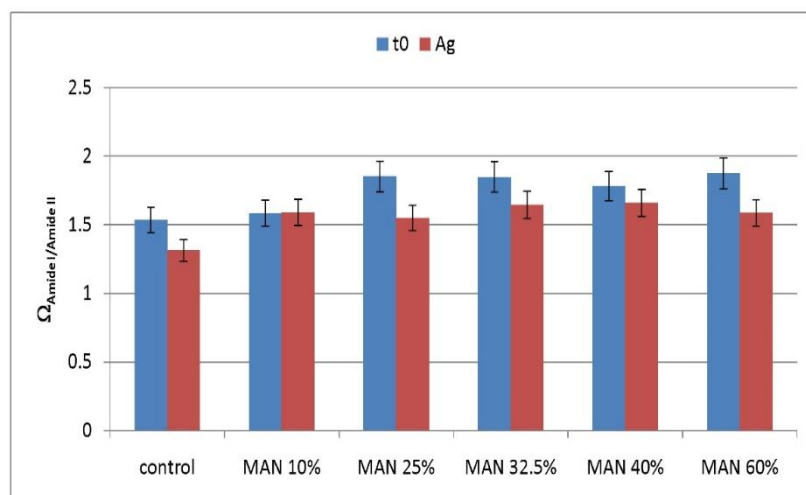

**Figure S16.** Values of  $\Omega_{\text{Amide I}} / A_{\text{Amide II}}$  as obtained from the IR spectra recorded in the parallel and perpendicular orientations on the samples under study (control = untreated fibers, and MAN grafted fibers containing different amounts of MAN) before ( $t_0$ ) and after ageing of the fibers in the  $\text{Ag}^+$  containing solution for 48h.

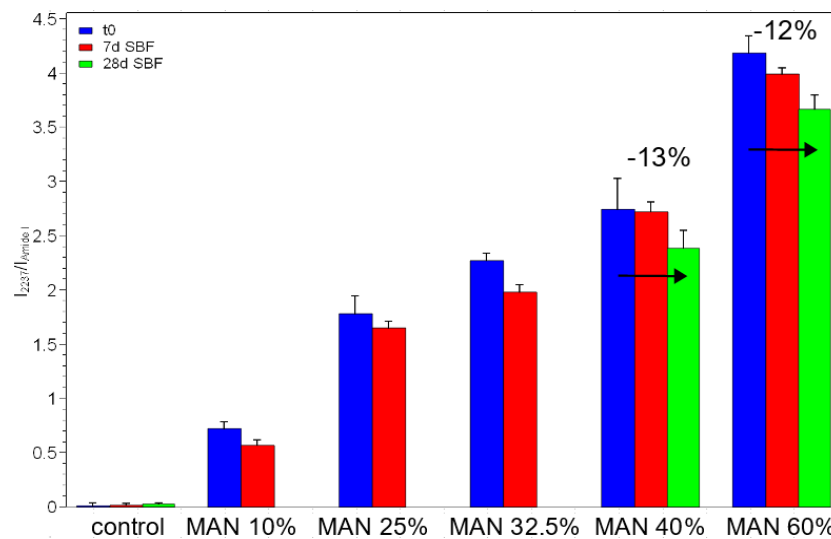

**Figure S17.** Trend of the  $I_{2237}/I_{amide\ I}$  Raman intensity ratio before and after 7 and 28 days of immersion in the SBF solution.

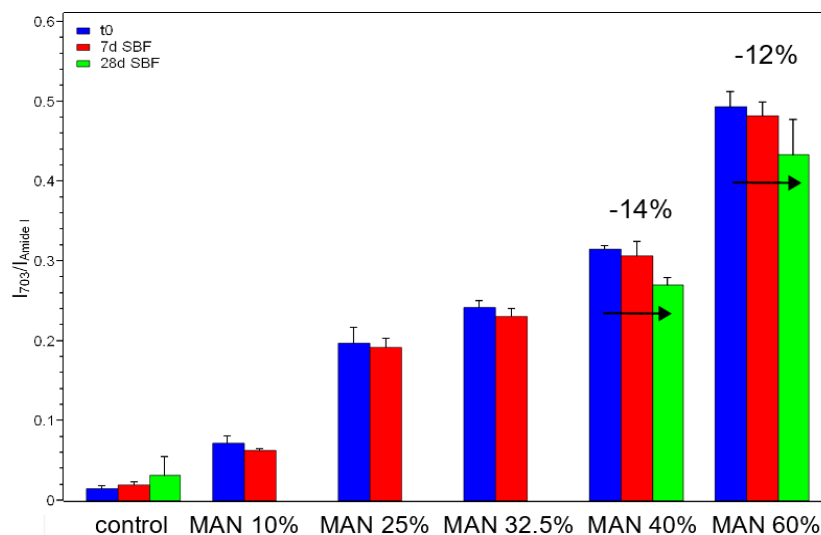

**Figure S18.** Trend of the  $I_{703}/I_{amide\ I}$  Raman intensity ratio before and after 7 and 28 days of immersion in the SBF solution.

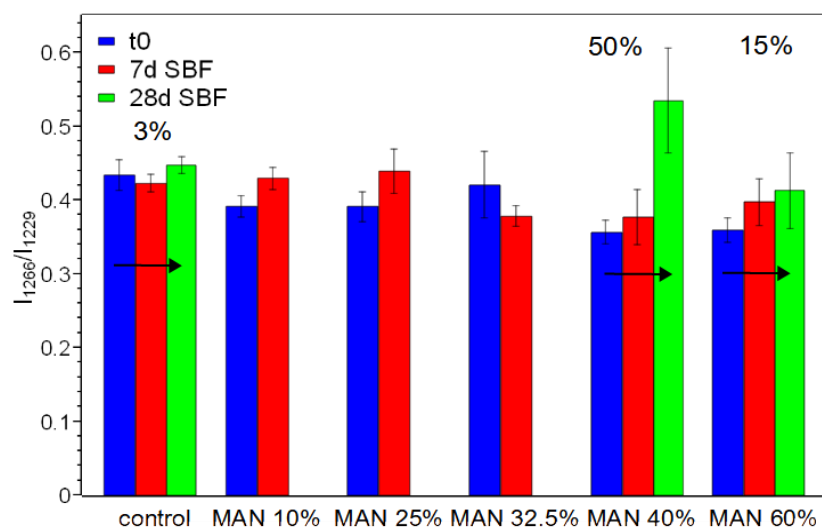

**Figure S19.** Trend of the  $I_{1266}/I_{1229}$  Raman intensity ratio before and after 7 and 28 days of immersion in the SBF solution.

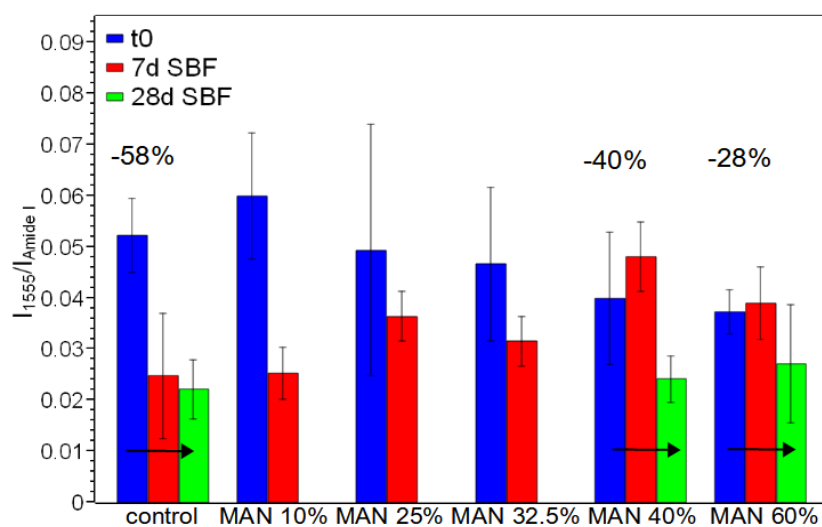

**Figure S20.** Trend of the  $I_{1555}/I_{amide\ I}$  Raman intensity ratio before and after 7 and 28 days of immersion in the SBF solution.

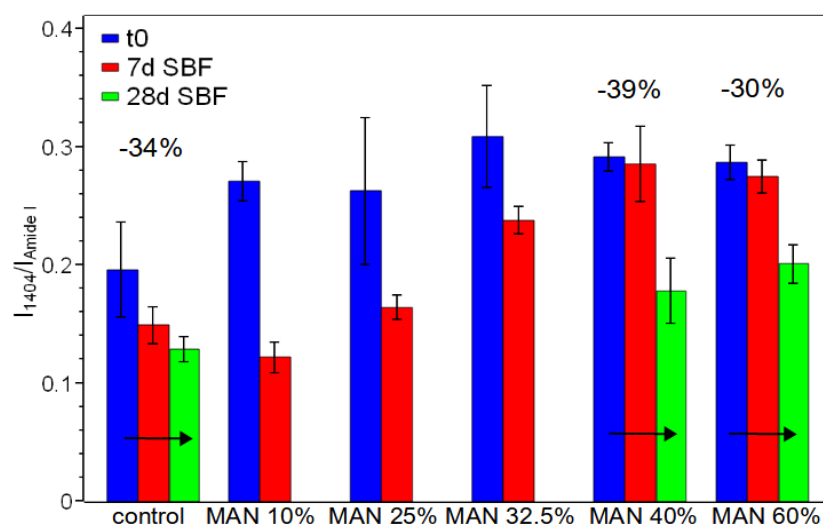

**Figure S21.** Trend of the  $I_{1404}/I_{amide\ I}$  Raman intensity ratio before and after 7 and 28 days of immersion in the SBF solution.

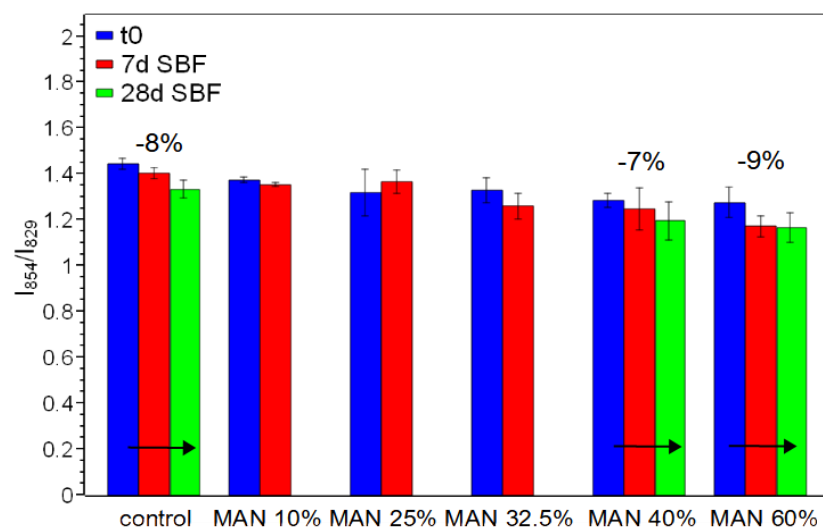

**Figure S22.** Trend of the  $I_{854}/I_{829}$  Raman intensity ratio before and after 7 and 28 days of immersion in the SBF solution.

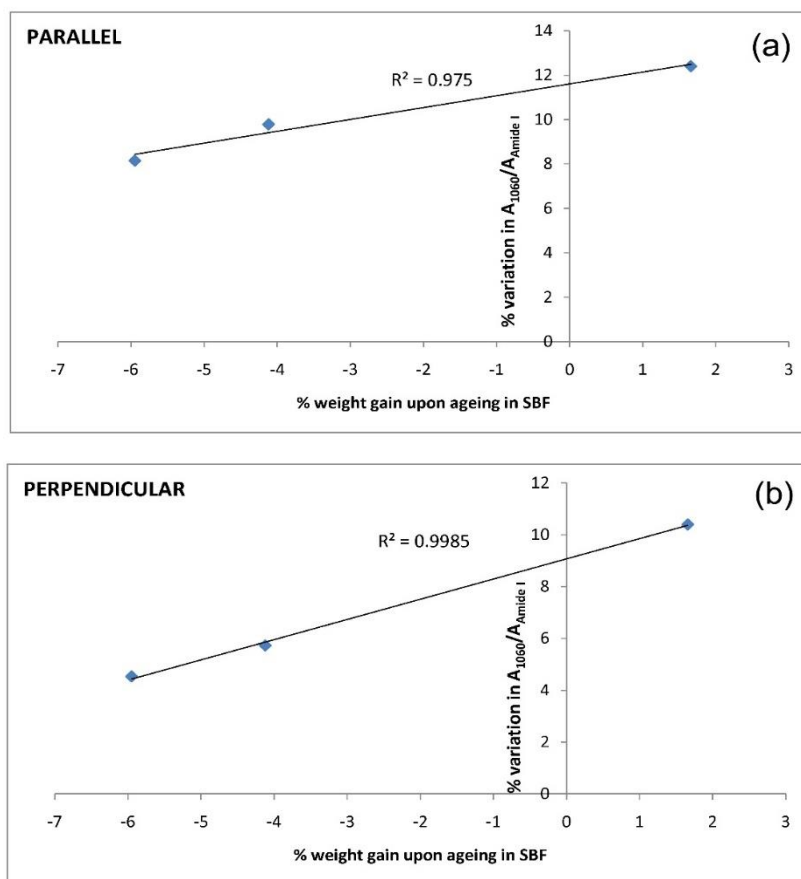

**Figure S23.** Trend of the % variation of the  $A_{1060}/A_{\text{amide I}}$  absorbance ratio ((a) parallel spectra; (b) perpendicular spectra) upon ageing in SBF for 28 days, as a function of the % weight gain.



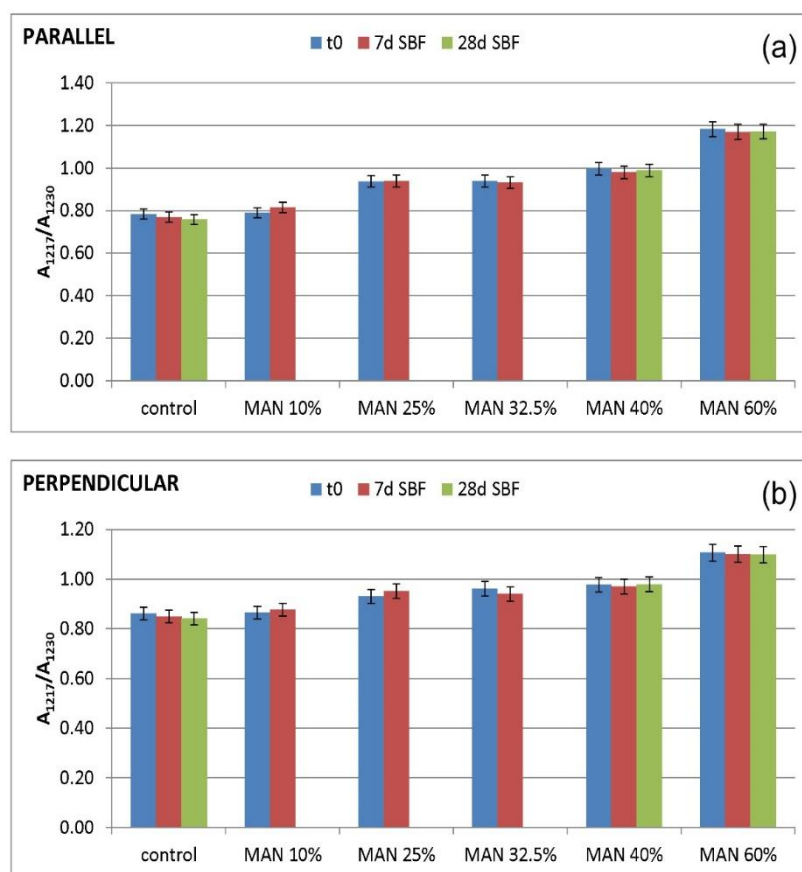

**Figure S24.** Values of the  $A_{1217}/A_{1230}$  absorbance ratio as obtained from the IR spectra recorded in the parallel (a) and perpendicular (b) orientations on the samples under study (control = untreated fibers, and MAN grafted fibers containing different amounts of MAN) before (t0) and after ageing of the fibers in SBF.

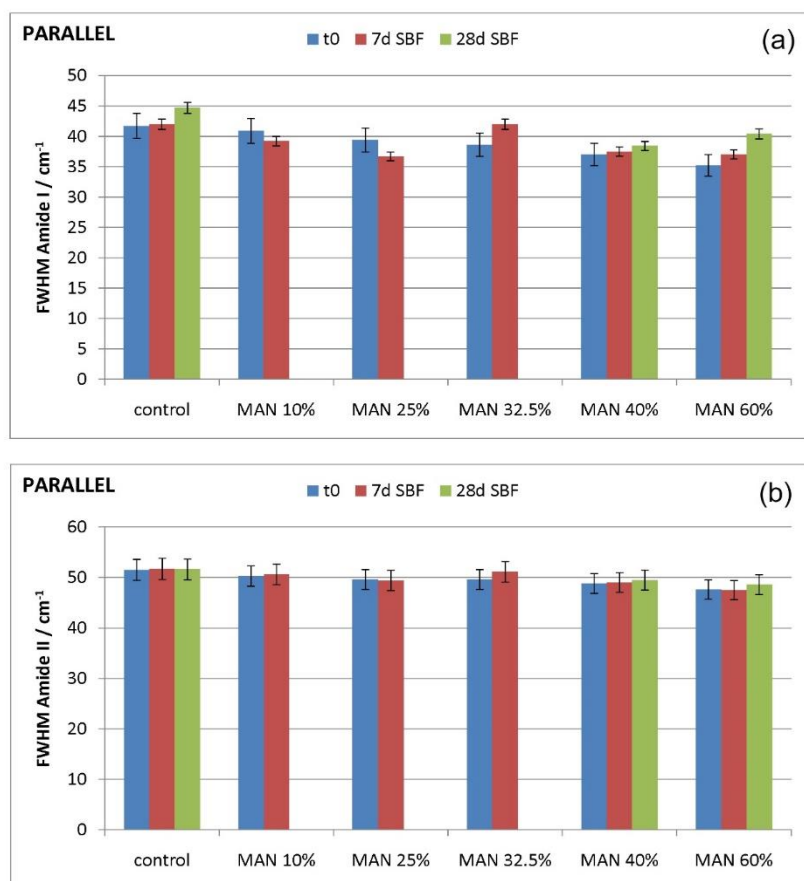

**Figure S25.** Values of the FWHM of Amide I (a) and Amide II (b) bands as obtained from the IR spectra recorded in the parallel orientation on the samples under study (control = untreated fibers, and MAN grafted fibers containing different amounts of MAN) before (t0) and after ageing of the fibers in SBF.

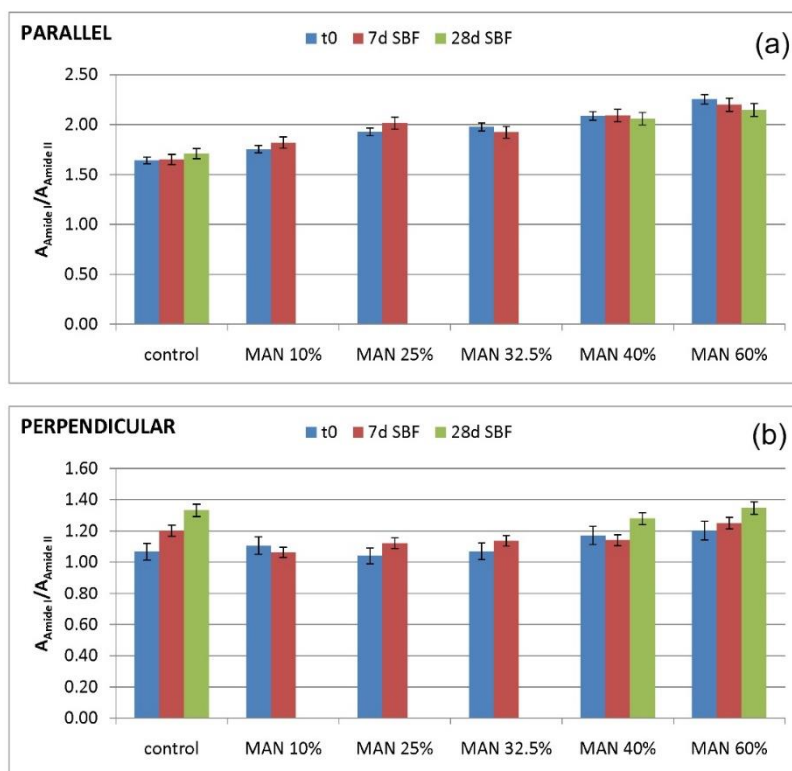

**Figure S26.** Values of the  $A_{\text{Amide I}}/A_{\text{Amide II}}$  absorbance ratio as obtained from the IR spectra recorded in the parallel (a) and perpendicular (b) orientations on the samples under study (control = untreated fibers, and MAN grafted fibers containing different amounts of MAN) before (t0) and after ageing of the fibers in SBF.

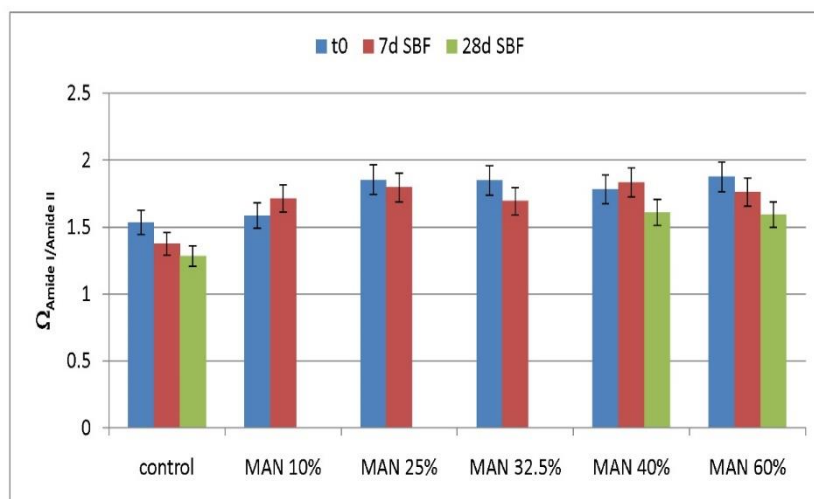

**Figure S27.** Values of the  $\Omega_{\text{Amide I/Amide II}}$  marker as obtained from the IR spectra recorded in the parallel and perpendicular orientations on the samples under study (control = untreated fibers, and MAN grafted fibers containing different amounts of MAN) before (t0) and after ageing of the fibers in SBF.

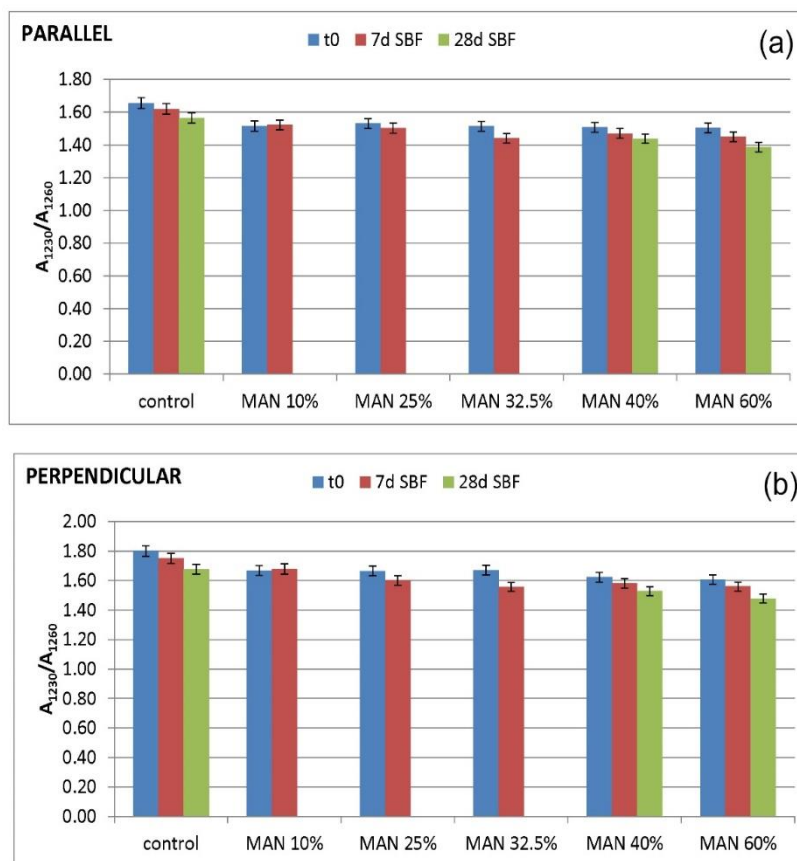

**Figure S28.** Values of the  $A_{1230}/A_{1260}$  absorbance ratio as obtained from the IR spectra recorded in the parallel (a) and perpendicular (b) orientations on the samples under study (control = untreated fibers, and MAN grafted fibers containing different amounts of MAN) before (t0) and after ageing of the fibers in SBF.

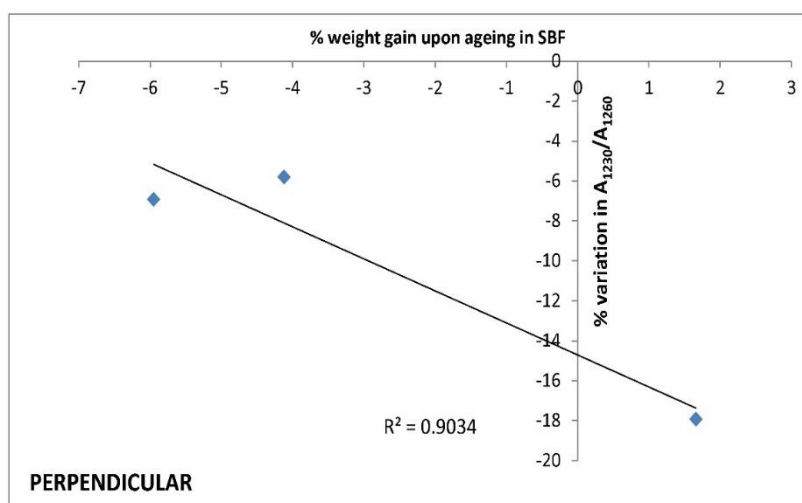

**Figure S29.** Trend of the % variation of the  $A_{1230}/A_{1260}$  absorbance ratio upon ageing in SBF for 28 days as a function of the % weight gain (perpendicular spectra).
